# Supplementary material
Source: Springer Nature journal article supplement (https://www.springermedizin.de/resource/supplementary/13002_2014_445_MOESM5_ESM.pdf/9626942)

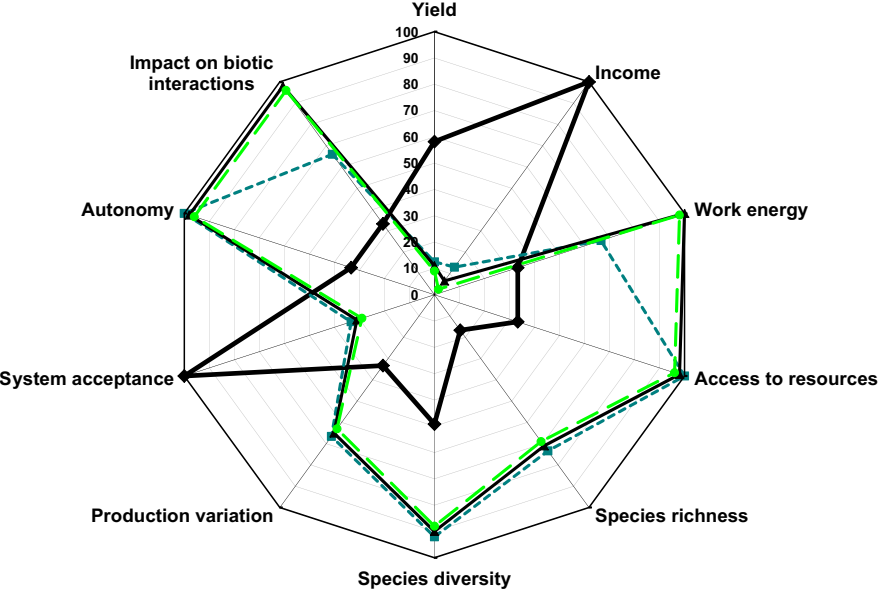

—◆— Maize system

- - -■- - Cacti system 50%

—▲— Cacti system 25%

- - -●- - Cacti system 10%

— Optimum

Supplement: MOESM5 [file 9626942]
